# Supplementary material for: Synthesis of stable and phase-adjustable CsPbBr3@Cs4PbBr6 nanocrystals via novel anion–cation reactions
Source: Royal Society of Chemistry journal article supplement (doi:10.1039/c8na00291f), 2018-12-27
Supplement: c8na00291f1.pdf [file c8na00291f1.pdf]

## Supporting Information

for

### **Synthesis of stable and phase-adjustable CsPbBr<sub>3</sub>@Cs<sub>4</sub>PbBr<sub>6</sub> nanocrystals via novel anion-cation reaction**

*Leimeng Xu, Jianhai Li, Tao Fang, Yongli Zhao, Shichen Yuan, Yuhui Dong, Jizhong Song\**

MIIT Key Laboratory of Advanced Display Materials and Devices  
Institute of Optoelectronics and Nanomaterials  
School of Materials Science and Engineering  
Nanjing University of Science and Technology, Nanjing 210094, China

Email address: Jizhong Song: [songjizhong@njut.edu.cn](mailto:songjizhong@njut.edu.cn) (corresponding author)

## Experiment Section

### *Materials*

PbBr<sub>2</sub>, CsBr, PDBr, cesium acetate, lead acetate, DMF, DMSO, DDA-Cl, acetonitrile (from Macklin reagent) Cesium stearate (CsSt, 98% pure, from J&K reagent), oleylamine (OAm, 80–90% pure, from Aladdin-reagent), oleic acid (OA, from Aladdin-reagent), 1-octadecene (ODE, >80% pure, from Aladdin-reagent), OAm-I (from Xi'an Baolaite) were used without further purification.

### *Synthesis of cubic CsPbBr<sub>3</sub> nanocrystals*

PbBr<sub>2</sub> (0.6 mmol) and CsBr (0.6 mmol) were dissolved in 10 mL dimethyl sulfoxide (DMSO) solution. OA (0.5 mL) and OAm (0.5 mL) were added to stabilize the precursor solution. Then, 1 mL of the precursor solution was quickly added into 20 mL toluene under vigorous stirring. Strong green-mission crude production was observed immediately after the injection. After reaction for 1 min, 10 mL acetonitrile was added into the green crude solution for purification. The precipitate was dispersed in toluene for further use after centrifugation.

### *Synthesis of cubic CsPbBr<sub>3</sub> nanocrystals*

15 mL of octadecene (ODE), 3 mL of OAm, 1.5 mL of OA, and PbBr<sub>2</sub> (0.2 g) were loaded into a 100 mL four-neck flask, degassed at 100 °C for 10 min, mixed at 100 °C for 30 min, and heated to 170 °C in 10 min under Ar flow. 0.55 mL of Cesium Stearate (CsSt) solution (0.15 M in ODE) was quickly injected. After 5 s, the reaction mixture was cooled by the ice-water bath. The resultant QDs were precipitated by 20 mL of acetone and separated via centrifugation. The separated QDs were redispersed in in toluene for further use.

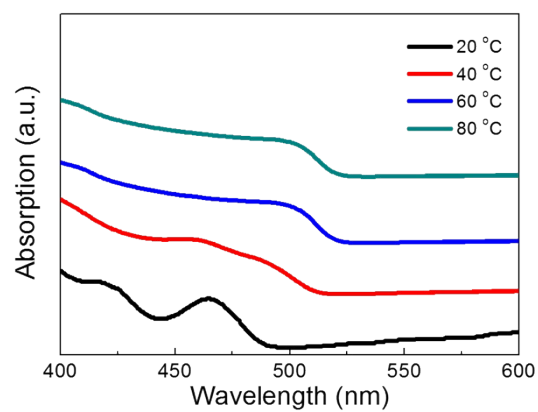

**Fig. S1** Absorption spectra of CsPbBr<sub>3</sub>@Cs<sub>4</sub>PbBr<sub>6</sub> NCs prepared at different temperature.
